# Supplementary material
Source: PubMed Central journal article supplement (PMC3164894)

FIG E1

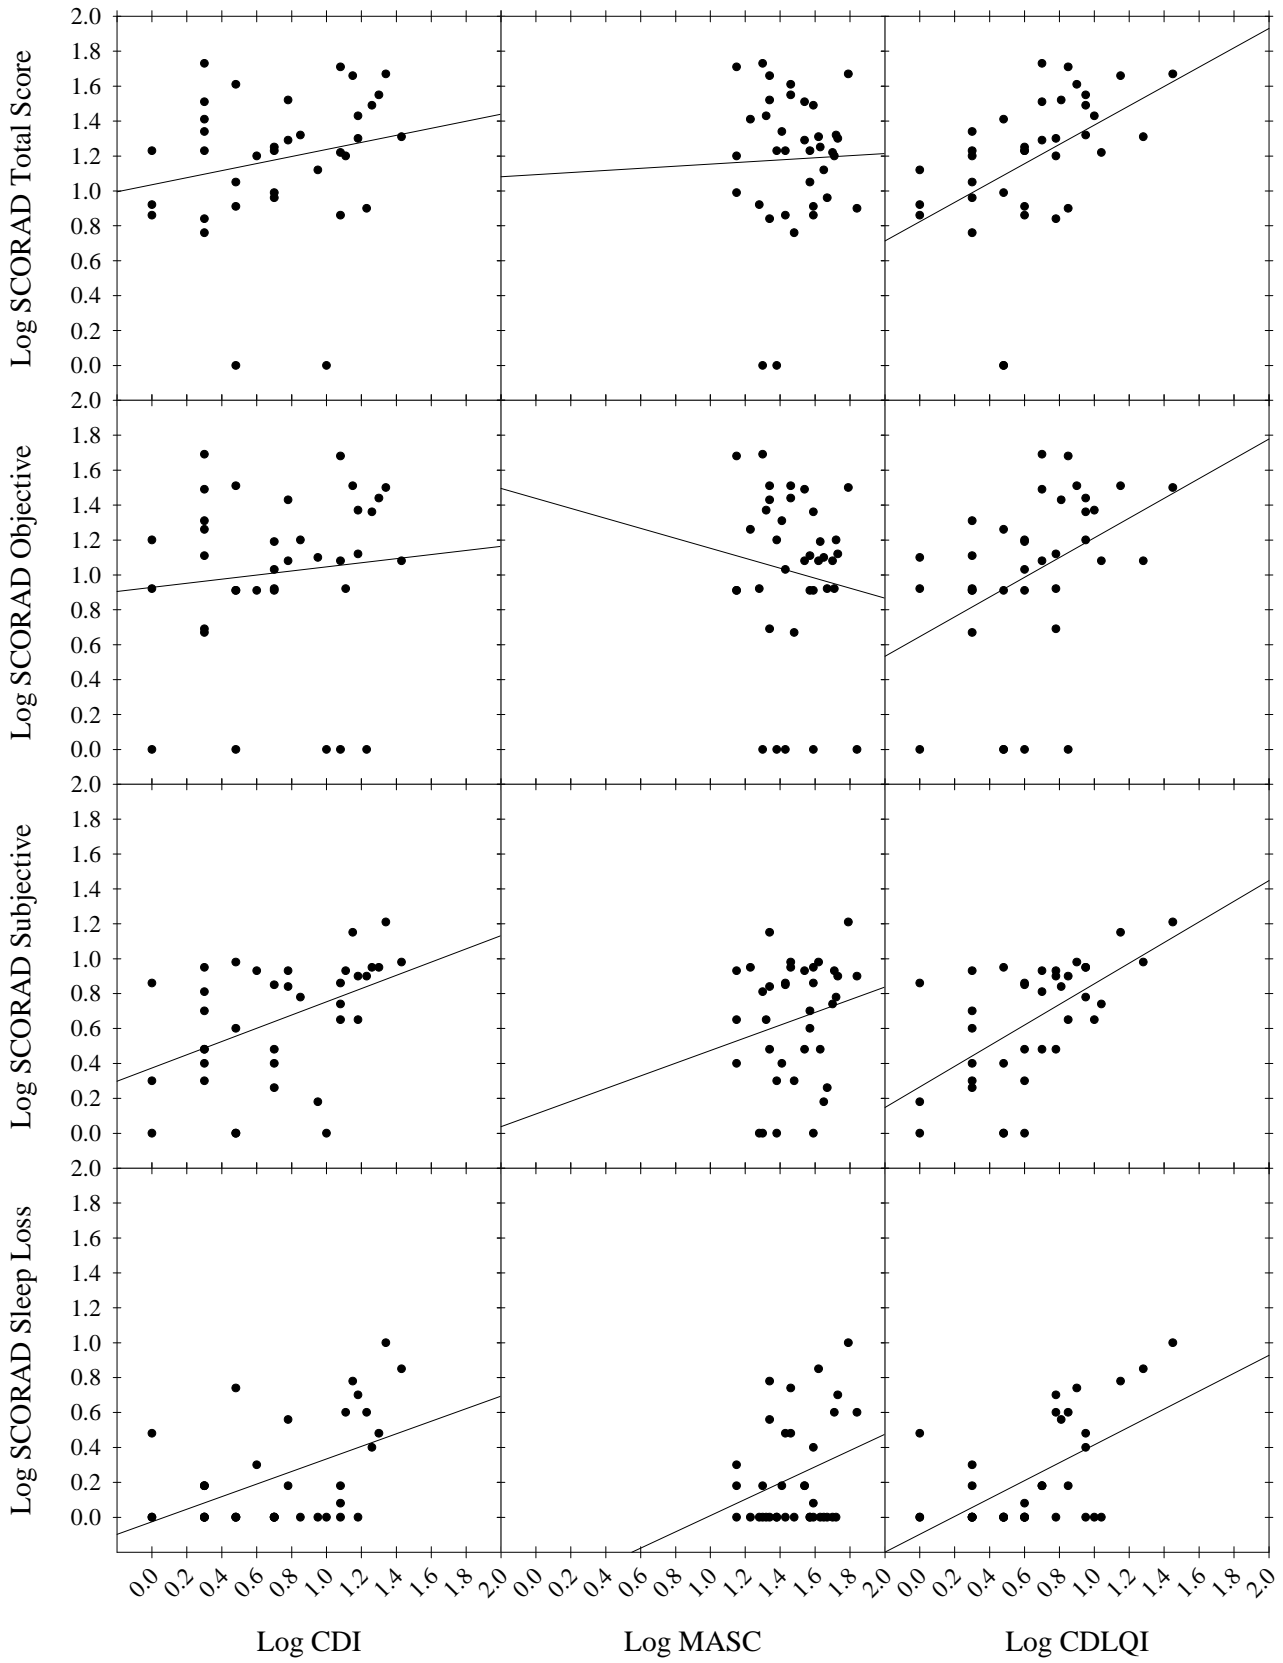

Supplement: NIHMS297299-supplement-supplement_1.pdf [file NIHMS297299-supplement-supplement_1.pdf]
